# Supplementary material
Source: PubMed Central journal article supplement (PMC3197258)

# A Modular Strategy for the Construction of Radiometallated Antibodies for Positron Emission Tomography Based on Inverse Electron Demand Diels-Alder Click Chemistry

*Brian M. Zeglis, Priya Mohindra, Gabriel I. Weissmann, Vadim Divilov, Scott A. Hilderbrand, Ralph  
Weissleder, and Jason S. Lewis*

## Supporting Information

### **Table of Contents**

|                                                      |         |
|------------------------------------------------------|---------|
| 1. Biodistribution Tumor:Organ Ratios                | S2 – S3 |
| 2. <sup>89</sup> Zr PET Maximum Intensity Projection | S4      |

**Table S1.** Tumor to organ ratios obtained from data collected in biodistribution experiment employing  $^{64}\text{Cu}$ -DOTA-T/N-trastuzumab in mice bearing bilateral s.c. BT-474 (HER2-positive) and MDA-MB-468 (HER2-negative) xenografts (n = 4 for each time point)

|                        | <b>6 h</b> | <b>12 h</b> | <b>24 h</b> | <b>48 h</b> | <b>72 h</b> |
|------------------------|------------|-------------|-------------|-------------|-------------|
| <b>HER2+/Blood</b>     | 0.5 ± 0.3  | 1.5 ± 0.5   | 2.5 ± 1.0   | 3.9 ± 0.9   | 4.7 ± 0.5   |
| <b>HER2+/HER2-</b>     | 1.7 ± 0.8  | 2.8 ± 1.0   | 2.9 ± 0.6   | 5.1 ± 1.7   | 4.7 ± 0.5   |
| <b>HER2+/Heart</b>     | 2.1 ± 1.1  | 3.6 ± 1.6   | 6.1 ± 1.6   | 10.2 ± 3.4  | 9.7 ± 5.3   |
| <b>HER2+/Lungs</b>     | 0.9 ± 0.4  | 2.5 ± 0.6   | 4.1 ± 1.6   | 5.5 ± 1.4   | 5.8 ± 0.3   |
| <b>HER2+/Liver</b>     | 0.9 ± 0.4  | 2.4 ± 0.5   | 2.7 ± 0.6   | 6.9 ± 1.2   | 6.8 ± 0.8   |
| <b>HER2+/Spleen</b>    | 0.9 ± 0.6  | 2.4 ± 0.6   | 2.5 ± 0.7   | 7.7 ± 1.5   | 8.0 ± 1.6   |
| <b>HER2+/Stomach</b>   | 5.5 ± 3.1  | 23.9 ± 10.6 | 10.9 ± 2.4  | 33.8 ± 9.8  | 30.6 ± 3.5  |
| <b>HER2+/Sm. Inst.</b> | 3.0 ± 1.8  | 11.4 ± 2.7  | 7.5 ± 3.7   | 20.0 ± 3.6  | 21.2 ± 1.1  |
| <b>HER2+/Lg. Inst.</b> | 5.2 ± 2.4  | 14.1 ± 2.8  | 8.4 ± 4.9   | 31.4 ± 8.7  | 27.6 ± 5.6  |
| <b>HER2+/Kidney</b>    | 1.9 ± 0.9  | 4.9 ± 1.4   | 9.0 ± 5.2   | 11.0 ± 2.2  | 12.2 ± 1.2  |
| <b>HER2+/Muscle</b>    | 17.3 ± 9.6 | 34.1 ± 20.6 | 43.5 ± 23.2 | 44.0 ± 11.7 | 68.9 ± 8.9  |
| <b>HER2+/Bone</b>      | 3.4 ± 3.3  | 17.1 ± 3.5  | 7.3 ± 1.6   | 40.0 ± 10.1 | 21.2 ± 9.0  |

**Table S2.** Tumor to organ ratios obtained from data collected in biodistribution experiment employing  $^{89}\text{Zr}$ -DFO-T/N-trastuzumab in mice bearing bilateral s.c. BT-474 (HER2-positive) and MDA-MB-468 (HER2-negative) xenografts (n = 4 for each time point)

|                        | <b>6 h</b> | <b>24 h</b> | <b>48 h</b> | <b>72 h</b> | <b>96 h</b> | <b>120 h</b> |
|------------------------|------------|-------------|-------------|-------------|-------------|--------------|
| <b>HER2+/Blood</b>     | 0.5 ± 0.2  | 1.3 ± 0.7   | 2.7 ± 1.1   | 3.1 ± 0.5   | 3.6 ± 0.5   | 3.8 ± 0.7    |
| <b>HER2+/HER2-</b>     | 2.0 ± 1.1  | 3.6 ± 1.2   | 4.4 ± 2.7   | 4.5 ± 0.8   | 4.3 ± 1.8   | 4.0 ± 0.4    |
| <b>HER2+/Heart</b>     | 1.0 ± 0.4  | 2.7 ± 1.1   | 10.7 ± 5.8  | 7.8 ± 3.2   | 8.5 ± 3.3   | 6.7 ± 0.7    |
| <b>HER2+/Lungs</b>     | 1.5 ± 0.5  | 3.1 ± 1.1   | 6.1 ± 2.7   | 6.3 ± 2.6   | 5.2 ± 3.1   | 5.4 ± 1.4    |
| <b>HER2+/Liver</b>     | 0.9 ± 0.3  | 2.8 ± 0.8   | 4.0 ± 1.7   | 4.8 ± 0.6   | 5.6 ± 1.3   | 5.2 ± 2.8    |
| <b>HER2+/Spleen</b>    | 2.0 ± 0.6  | 3.4 ± 1.4   | 4.3 ± 1.5   | 5.0 ± 1.8   | 5.7 ± 3.0   | 6.5 ± 3.2    |
| <b>HER2+/Stomach</b>   | 3.4 ± 1.2  | 15.7 ± 2.4  | 25.6 ± 7.7  | 37.6 ± 10.1 | 38.0 ± 8.9  | 38.8 ± 6.8   |
| <b>HER2+/Sm. Inst.</b> | 2.7 ± 1.0  | 7.7 ± 1.2   | 8.1 ± 3.1   | 15.6 ± 3.9  | 19.0 ± 4.9  | 15.9 ± 3.0   |
| <b>HER2+/Lg. Inst.</b> | 5.1 ± 1.9  | 23.1 ± 7.4  | 37.6 ± 5.9  | 32.7 ± 13.2 | 72.2 ± 22.9 | 49.9 ± 18.0  |
| <b>HER2+/Kidney</b>    | 1.4 ± 0.6  | 3.7 ± 0.6   | 9.1 ± 2.0   | 6.5 ± 1.6   | 7.1 ± 0.8   | 8.0 ± 2.7    |
| <b>HER2+/Muscle</b>    | 10.4 ± 4.1 | 21.1 ± 3.5  | 40.0 ± 13.2 | 34.1 ± 7.1  | 32.8 ± 4.6  | 27.9 ± 2.7   |
| <b>HER2+/Bone</b>      | 1.9 ± 0.6  | 3.7 ± 0.8   | 4.4 ± 1.2   | 4.9 ± 0.8   | 4.9 ± 1.2   | 4.6 ± 0.5    |

**Figure S1.** Maximum intensity projection from PET image of  $^{89}\text{Zr}$ -DFO-T/N-trastuzumab trastuzumab (0.56 – 0.74 MBq [15-20  $\mu\text{Ci}$ ] in 200  $\mu\text{L}$  0.9% sterile saline) in a mouse bearing bilateral BT-474 (HER2-positive, right shoulder) and MDA-MB-468 (HER2-negative, left shoulder) at t = 96 h. The white lines are shown to illustrate the HER2-positive tumor, HER2-negative tumor, and residual bone uptake.

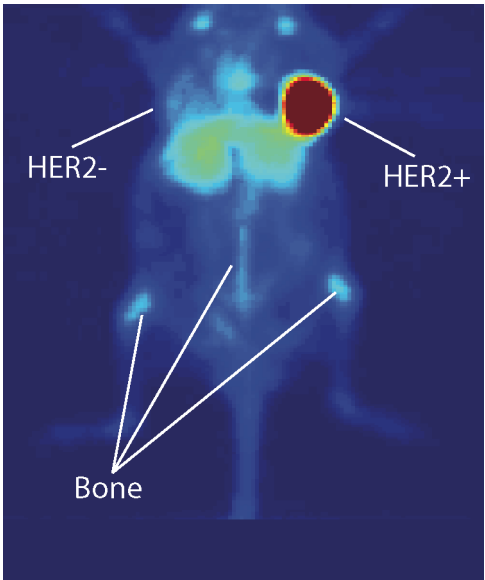

Supplement: bc200288d_si_001.pdf [file bc200288d_si_001.pdf]
